# Supplementary figures and images for: Machine Learning Models for Genetic Risk Assessment of Infants with Non-syndromic Orofacial Cleft
Source: PubMed Central journal article supplement — Genomics Proteomics Bioinformatics. 2018 Dec 19;16(5):354–64. doi: 10.1016/j.gpb.2018.07.005 (PMC6364041; doi:10.1016/j.gpb.2018.07.005), 2018-12-19

**A** rs642961-A (*IRF6* - *DIEXF*)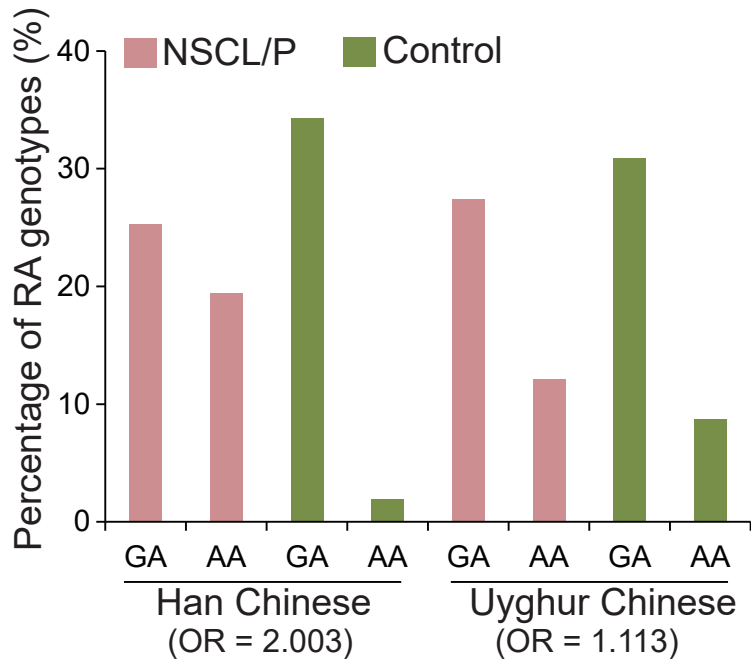**B** rs3733585-C (*SLC2A9*)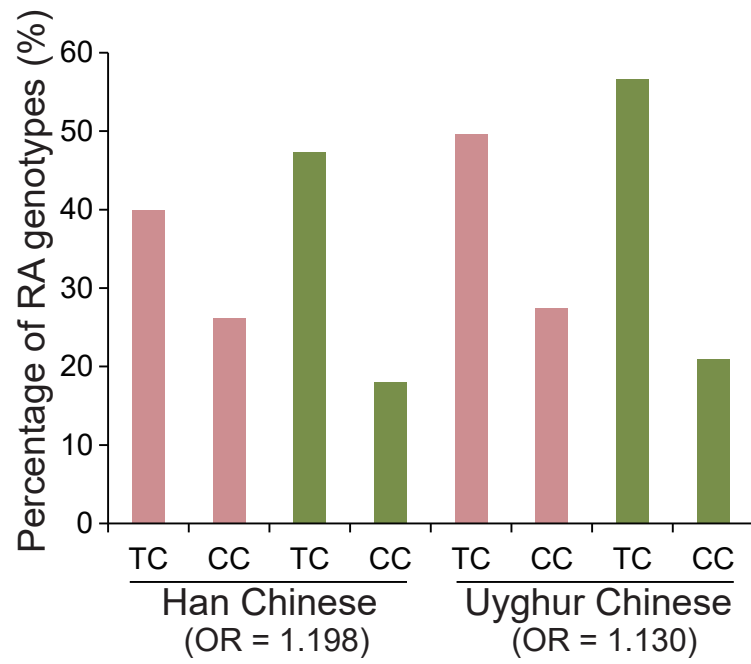**C** rs987525-A (*GSDMC* - *PVT1*)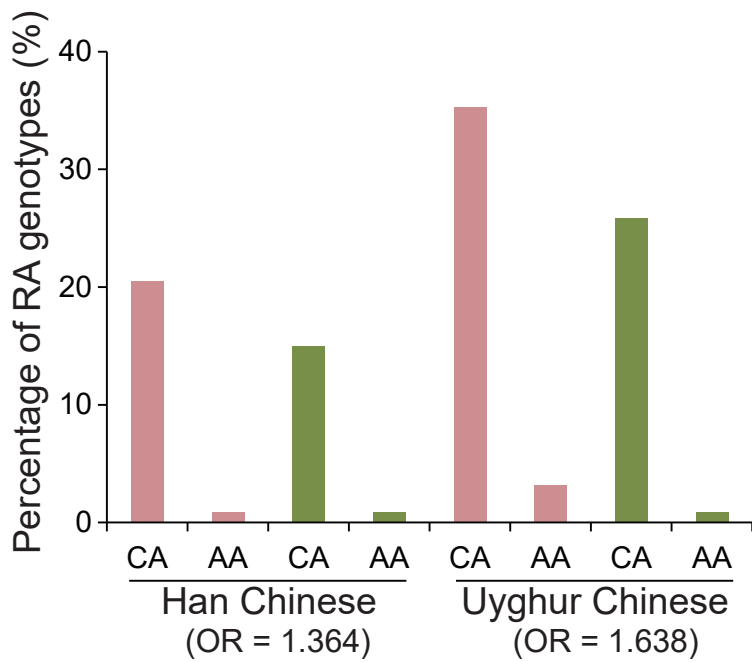**D** rs227731-C (*NOG*)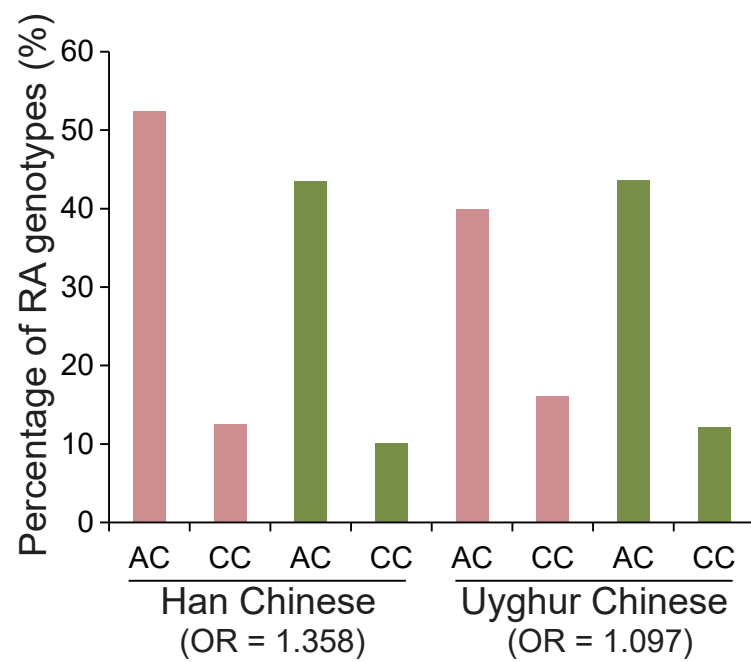

Supplement: mmc1.pdf [file mmc1.pdf]

**A** rs1801133-T (*MTHFR*)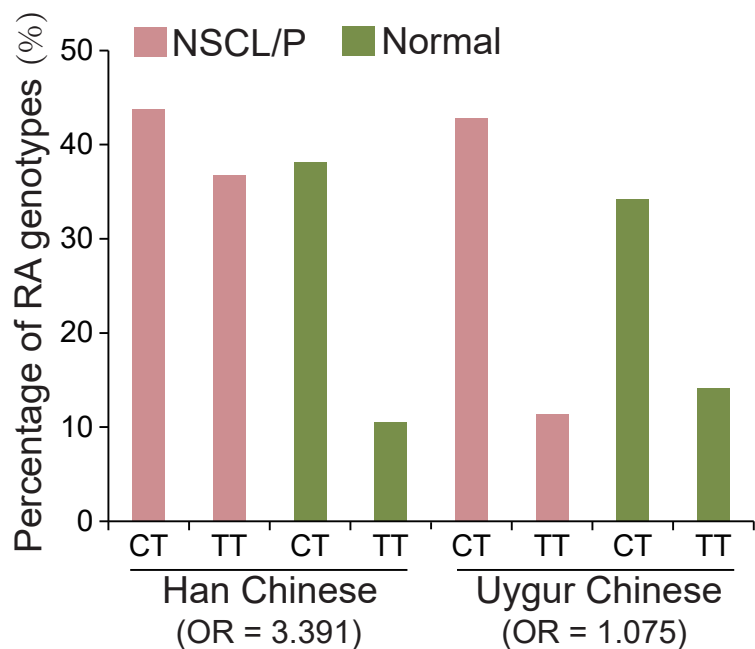**B** rs1801131-C (*MTHFR*)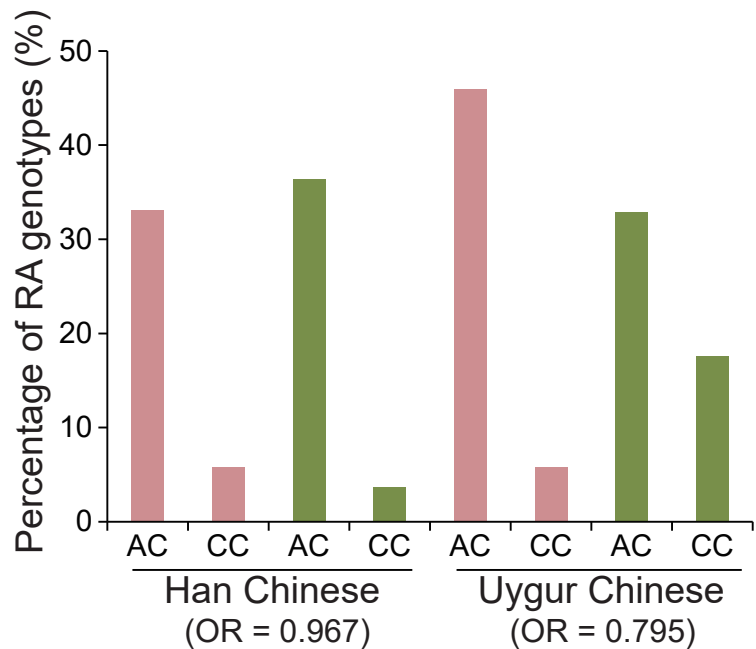**C** rs2236225-T (*MTHFD1*)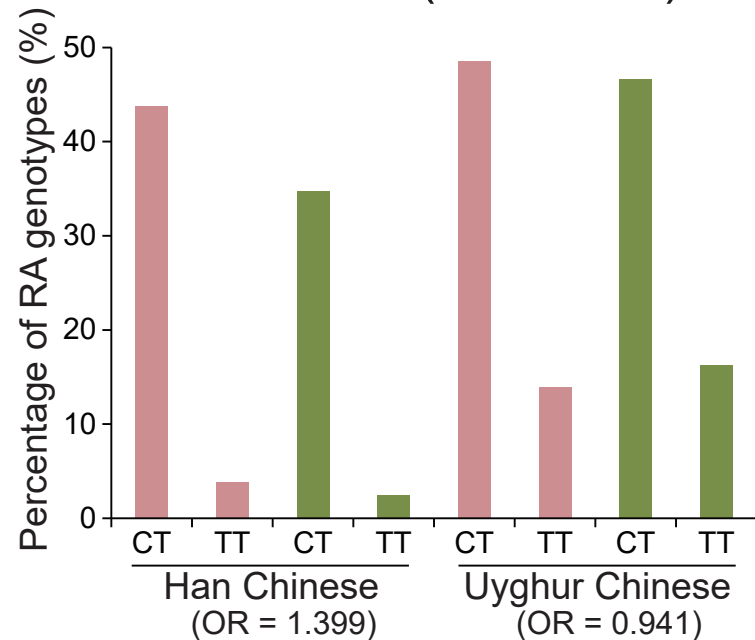**D** rs10882272-C (*RBP4*)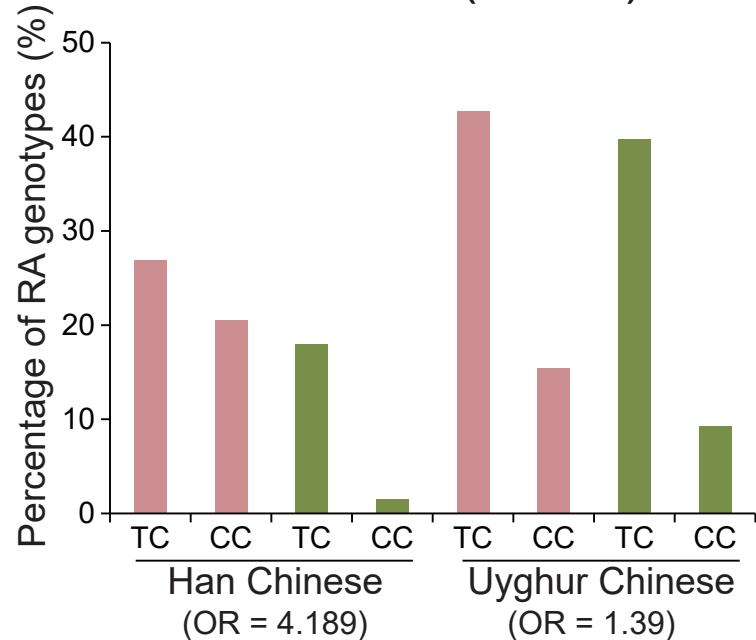**E** rs2294426-C (*ADTRP*)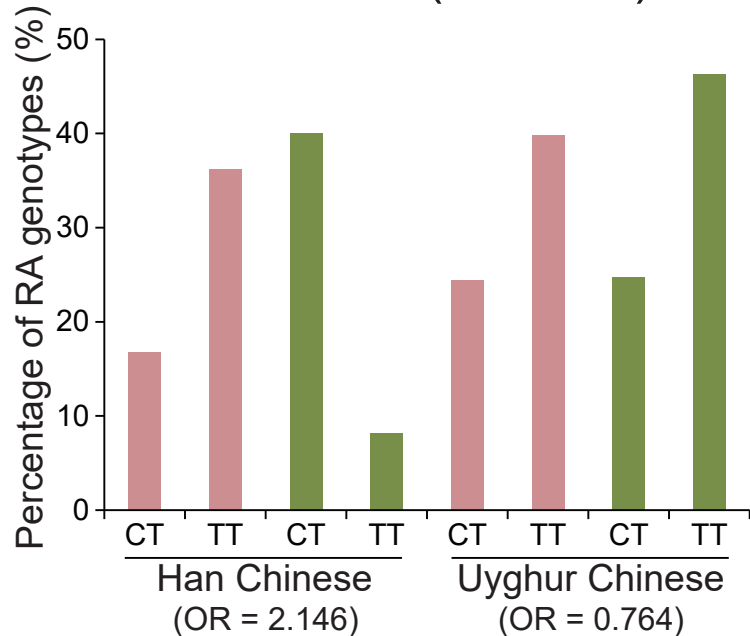**F** rs7820074-C (intergenic)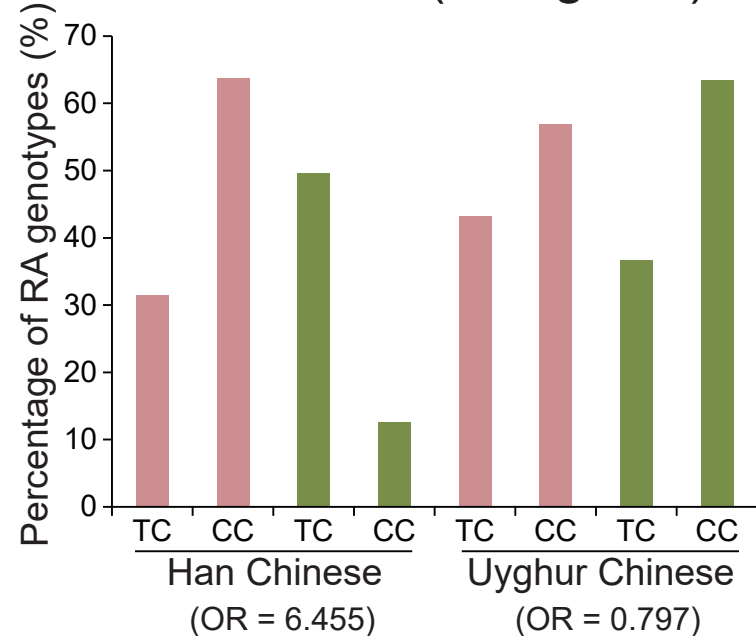

Supplement: mmc2.pdf [file mmc2.pdf]
